# Supplementary material
Source: PubMed Central journal article supplement (PMC2771436)
Supplement: NIHMS132614-supplement-1_si_001.pdf [file NIHMS132614-supplement-1_si_001.pdf]

## Supplementary Information

### Structure-activity relationship and comparative docking studies for cycloguanil analogs as *Pf*DHFR-TS inhibitors

Prasanna Sivaprakasam,<sup>1</sup> Perrin N. Tosso,<sup>1,2</sup> Robert J. Doerksen\*<sup>1,3</sup>

**Table S1.** FlexX docking scores for the 10 cycloguanil derivatives.

| Compd.    | pIC <sub>50</sub> | Total score | DScore | PMF    | GScore  | CScore |
|-----------|-------------------|-------------|--------|--------|---------|--------|
| <b>17</b> | 8.82              | -11.93      | -70.01 | -55.13 | -103.77 | -21.31 |
| <b>18</b> | 7.61              | -17.12      | -57.29 | -50.61 | -71.66  | -20.31 |
| <b>23</b> | 8.96              | -18.65      | -69.46 | -53.25 | -99.02  | -17.31 |
| <b>29</b> | 7.70              | -13.31      | -67.11 | -30.64 | -121.43 | -15.35 |
| <b>30</b> | 8.34              | -16.75      | -70.54 | -42.58 | -96.75  | -15.71 |
| <b>31</b> | 6.48              | -16.74      | -60.49 | -40.01 | -95.83  | -20.69 |
| <b>32</b> | 8.43              | -16.61      | -70.08 | -36.78 | -99.21  | -22.38 |
| <b>33</b> | 8.96              | -16.42      | -76.20 | -54.98 | -122.3  | -22.50 |
| <b>38</b> | 8.74              | -18.87      | -54.95 | 14.86  | -110.01 | -15.51 |
| <b>39</b> | 6.57              | -22.55      | -60.78 | -62.97 | -96.20  | -20.05 |

**Table S2.** RMSD (Å) between the experimental and FlexX predicted binding modes for the reference ligand.

| Pose    | RMSD   |
|---------|--------|
| 1       | 3.3042 |
| 2       | 9.3445 |
| 3       | 3.7891 |
| 4       | 4.0436 |
| 5       | 2.9570 |
| 6       | 3.6239 |
| 7       | 4.1520 |
| 8       | 3.1986 |
| 9       | 6.2253 |
| 10      | 2.4295 |
| 11      | 5.3428 |
| 12      | 5.4761 |
| 13      | 5.9110 |
| 14      | 3.0736 |
| 15      | 5.7219 |
| 16      | 2.4195 |
| 17      | 6.2390 |
| 18      | 6.1298 |
| 19      | 5.3116 |
| 20      | 6.0926 |
| 21      | 5.5324 |
| 22      | 5.8567 |
| 23      | 5.9768 |
| 24      | 6.3514 |
| 25      | 6.2271 |
| 26      | 5.9933 |
| 27      | 3.3939 |
| 28      | 6.2433 |
| 29      | 5.8216 |
| 30      | 2.9382 |
| Average | 4.9707 |

**Table S3.** Glide docking scores for the 10 cycloguanil derivatives.

| Compd.    | pIC <sub>50</sub> | GScore | EModel | GScore <sup>‡</sup> | EModel <sup>‡</sup> |
|-----------|-------------------|--------|--------|---------------------|---------------------|
| <b>17</b> | 8.82              | -7.81  | -48.8  | -                   | -                   |
| <b>18</b> | 7.61              | -8.22  | -54.4  | -8.23               | -54.5               |
| <b>23</b> | 8.96              | -7.34  | -46.2  | -7.70               | -49.5               |
| <b>29</b> | 7.70              | -7.88  | -46.9  | -7.73               | -49.5               |
| <b>30</b> | 8.34              | -8.20  | -49.9  | -8.19               | -50.0               |
| <b>31</b> | 6.48              | -7.91  | -51.6  | -7.92               | -51.7               |
| <b>32</b> | 8.43              | -7.13  | -50.3  | -7.86               | -53.9               |
| <b>33</b> | 8.96              | -7.40  | -47.3  | -8.24               | -50.7               |
| <b>38</b> | 8.74              | -7.92  | -50.9  | -7.91               | -51.4               |
| <b>39</b> | 6.57              | -8.69  | -54.1  | -8.69               | -54.1               |

<sup>‡</sup>After Ruvinsky's correction

**Table S4.** RMSD (Å) between the experimental and Glide predicted binding modes for the reference ligand.

| Pose    | RMSD   |
|---------|--------|
| 1       | 1.7342 |
| 2       | 2.3684 |
| 3       | 2.5834 |
| 4       | 2.1813 |
| 5       | 1.8795 |
| 6       | 2.0504 |
| 7       | 2.9501 |
| 8       | 2.2556 |
| 9       | 4.5079 |
| 10      | 2.4747 |
| 11      | 2.8592 |
| 12      | 3.3326 |
| 13      | 2.8739 |
| 14      | 4.4170 |
| 15      | 3.2587 |
| 16      | 2.9694 |
| 17      | 4.4732 |
| 18      | 5.2520 |
| 19      | 4.1844 |
| 20      | 4.8815 |
| 21      | 3.0231 |
| 22      | 4.6167 |
| 23      | 2.9953 |
| 24      | 3.5442 |
| 25      | 2.3898 |
| 26      | 4.8969 |
| 27      | 4.2316 |
| 28      | 4.8608 |
| 29      | 3.3806 |
| 30      | 4.5467 |
| Average | 3.3991 |

**Table S5.** Molegro docking scores for the 10 cycloguanil derivatives.

| Compd.    | pIC <sub>50</sub> | Moldock score <sup>#</sup> | Rerank score <sup>#</sup> | Protein–<br>ligand<br>interaction | Moldock score <sup>#</sup> | Rerank score <sup>#</sup> | Protein–<br>ligand<br>interaction |
|-----------|-------------------|----------------------------|---------------------------|-----------------------------------|----------------------------|---------------------------|-----------------------------------|
|           |                   |                            |                           | score <sup>#</sup>                |                            |                           | score <sup>#</sup>                |
|           |                   | MolDock                    |                           |                                   | MolDock[GRID]              |                           |                                   |
| <b>17</b> | 8.82              | –80.54                     | –71.26                    | –91.80                            | –86.02                     | –75.23                    | –97.28                            |
| <b>18</b> | 7.61              | –60.69                     | –55.88                    | –74.87                            | –69.81                     | –62.19                    | –82.48                            |
| <b>23</b> | 8.96              | –78.98                     | –70.23                    | –90.30                            | –85.63                     | –74.56                    | –96.94                            |
| <b>29</b> | 7.70              | –76.95                     | –69.04                    | –89.61                            | –79.18                     | –71.09                    | –91.84                            |
| <b>30</b> | 8.34              | –83.73                     | –73.35                    | –94.92                            | –86.59                     | –75.48                    | –97.78                            |
| <b>31</b> | 6.48              | –60.63                     | –56.75                    | –74.55                            | –67.21                     | –62.10                    | –80.65                            |
| <b>32</b> | 8.43              | –81.37                     | –72.32                    | –93.85                            | –84.87                     | –74.31                    | –96.35                            |
| <b>33</b> | 8.96              | –85.30                     | –74.38                    | –96.16                            | –90.13                     | –77.59                    | –101.13                           |
| <b>38</b> | 8.74              | –81.19                     | –72.59                    | –92.76                            | –85.82                     | –76.18                    | –97.60                            |
| <b>39</b> | 6.57              | –64.87                     | –58.57                    | –77.11                            | –77.11                     | –68.37                    | –88.91                            |

<sup>#</sup>Average of 5 consecutive runs

**Table S6.** RMSD (Å) between the experimental and Molegro predicted binding modes for the reference ligand.

| Pose    | RMSD    |                   |
|---------|---------|-------------------|
|         | MolDock | MolDock<br>[GRID] |
| 1       | 2.4232  | 1.0176            |
| 2       | 1.2504  | 2.1118            |
| 3       | 2.0933  | 2.3911            |
| 4       | 1.8448  | 1.5438            |
| 5       | 1.6802  | 1.9329            |
| 6       | 2.2424  | 3.1997            |
| 7       | 1.5540  | 2.3256            |
| 8       | 2.3968  | 1.9438            |
| 9       | 2.6387  | 2.7014            |
| 10      | 3.3074  | 2.6230            |
| Average | 2.1431  | 2.1791            |

**Table S7.** GOLD docking scores for the 10 cycloguanil derivatives.

| Compd.    | pIC <sub>50</sub> | GoldScore <sup>#</sup> | CScore <sup>#</sup> | ASP <sup>#</sup> |
|-----------|-------------------|------------------------|---------------------|------------------|
| <b>17</b> | 8.82              | 51.45                  | 23.61               | 37.15            |
| <b>18</b> | 7.61              | 44.86                  | 21.07               | 33.33            |
| <b>23</b> | 8.96              | 52.07                  | 23.52               | 35.54            |
| <b>29</b> | 7.70              | 48.41                  | 22.21               | 36.00            |
| <b>30</b> | 8.34              | 48.65                  | 22.11               | 37.52            |
| <b>31</b> | 6.48              | 42.80                  | 19.92               | 32.44            |
| <b>32</b> | 8.43              | 51.44                  | 23.94               | 36.98            |
| <b>33</b> | 8.96              | 54.37                  | 25.35               | 38.64            |
| <b>38</b> | 8.74              | 51.02                  | 23.67               | 36.76            |
| <b>39</b> | 6.57              | 42.94                  | 20.24               | 34.66            |

<sup>#</sup>Average of 5 consecutive runs

**Table S8.** RMSD (Å) between the experimental and GOLD predicted binding modes for the reference ligand.

| Pose    | RMSD      |        |        |
|---------|-----------|--------|--------|
|         | GoldScore | CScore | ASP    |
| 1       | 2.4250    | 3.6963 | 1.4708 |
| 2       | 3.3834    | 5.4788 | 1.2903 |
| 3       | 2.5714    | 3.8679 | 2.0605 |
| 4       | 2.8320    | 4.0842 | 2.3220 |
| 5       | 4.0568    | 1.4678 | 1.5888 |
| 6       | 2.6393    | 5.9000 | 1.8057 |
| 7       | 3.1113    | 3.9081 | 1.6926 |
| 8       | 1.5848    | 3.7465 | 2.6779 |
| 9       | 2.5700    | 3.8407 | 2.7183 |
| 10      | 4.7577    | 2.7546 | 1.9293 |
| Average | 2.9932    | 3.8745 | 1.9556 |



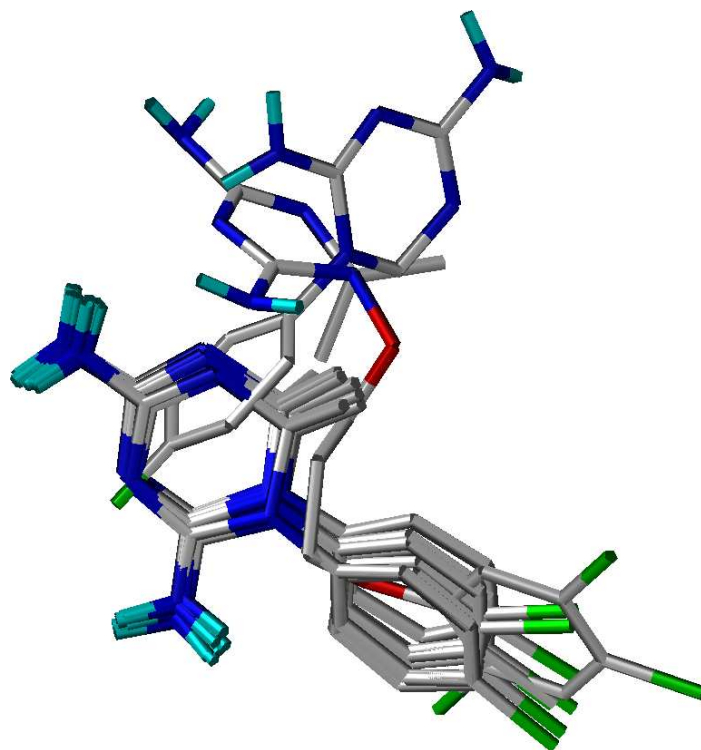

**Figure S1.** FlexX predicted binding modes of 10 cycloguanil derivatives and the reference compound. Non-polar hydrogens are not shown for clarity.

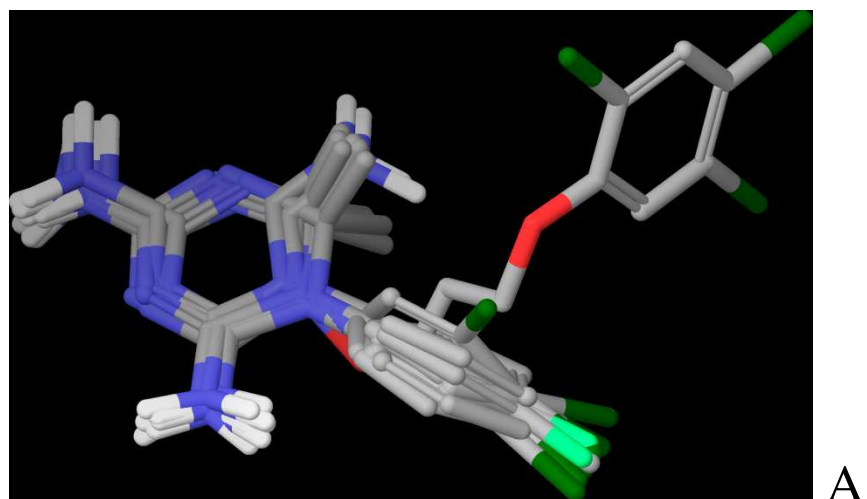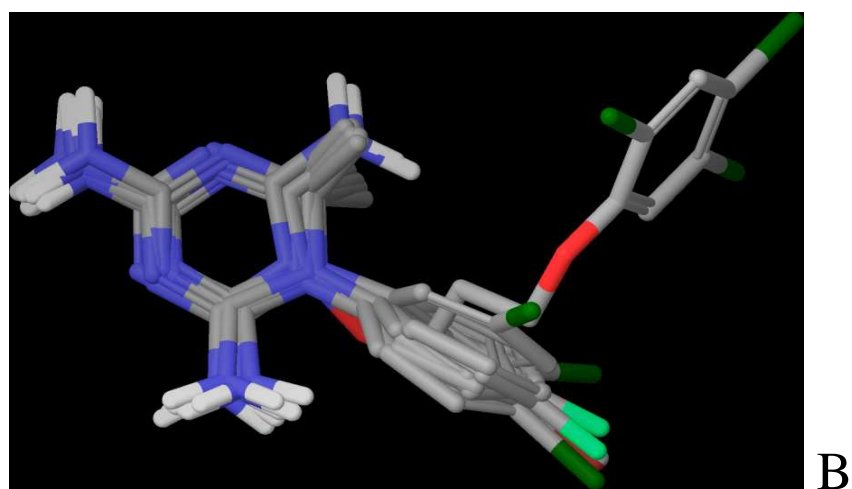

**Figure S2.** Glide predicted binding modes of 10 cycloguanil derivatives and the reference compound. Non-polar hydrogens are not shown for clarity. A. Glide SP poses and B. Glide SP poses after Ruvinsky's treatment.

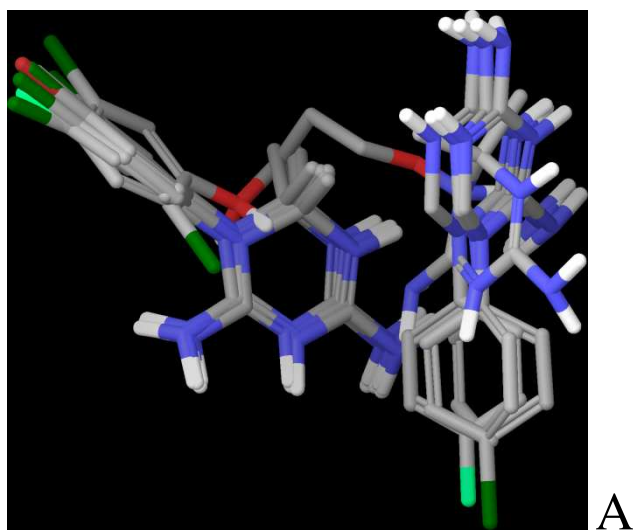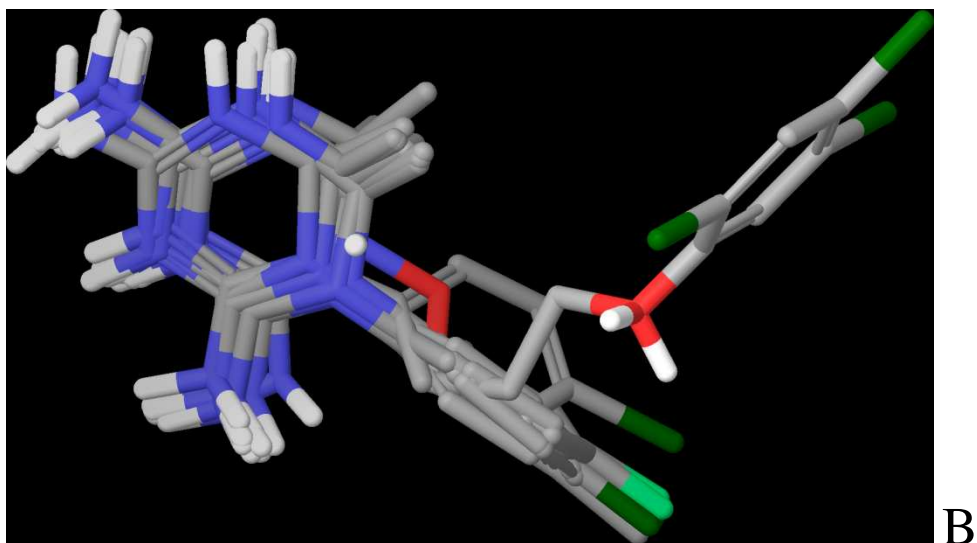

**Figure S3.** Gold predicted binding modes of 10 cycloguanil derivatives and the reference compound. Non-polar hydrogens are not shown for clarity. A. CScore and B. ASP.
